# Supplementary material
Source: publisher figshare collection journal article supplement (https://acs.figshare.com/ndownloader/files/23066891)
Supplement: Supplementary file 1 [file 23066891]

## **Supporting Information**

### **Insulator-to-Metal Transition of Cr<sub>2</sub>O<sub>3</sub> Thin Films via Isovalent Ru<sup>3+</sup>**

#### **Substitution**

Kohei Fujiwara,<sup>\*,†</sup> Miho Kitamura,<sup>‡</sup> Daisuke Shiga,<sup>‡,⊥</sup> Yasuhiro Niwa,<sup>‡</sup> Koji Horiba,<sup>‡</sup>  
Tsutomu Nojima,<sup>†</sup> Hiromichi Ohta,<sup>§</sup> Hiroshi Kumigashira,<sup>‡,⊥</sup> and Atsushi Tsukazaki<sup>†,#</sup>

<sup>†</sup>Institute for Materials Research, Tohoku University, Sendai 980-8577, Japan

<sup>‡</sup>Institute of Materials Structure Science, High Energy Accelerator Research Organization  
(KEK), Tsukuba 305-0801, Japan

<sup>⊥</sup>Institute of Multidisciplinary Research for Advanced Materials, Tohoku University, Sendai  
980-8577, Japan

<sup>§</sup>Research Institute for Electronic Science, Hokkaido University, Sapporo 001-0020, Japan

<sup>#</sup>Center for Spintronics Research Network (CSRN), Tohoku University, Sendai 980-8577,  
Japan

\* Author to whom correspondence should be addressed: [kfujiwara@imr.tohoku.ac.jp](mailto:kfujiwara@imr.tohoku.ac.jp)

**Table S1.** Growth conditions,  $x$  values, and  $t$  values for some of the  $(\text{Cr}_{1-x}\text{Ru}_x)_2\text{O}_3$  films used in this study. The deposition duration was not constant. XRD: X-ray diffraction, E: electrical measurements, M: magnetization measurements, TEM: transmission electron microscopy, PES: photoemission spectroscopy, and XAS: X-ray absorption spectroscopy.

| Sample ID | Nominal Ru / Cr<br>ratio in targets | $T_g$ ( $^{\circ}\text{C}$ ) | Ru content $x$<br>by SEM-EDX | Thickness $t$<br>(nm) | Experiment       |
|-----------|-------------------------------------|------------------------------|------------------------------|-----------------------|------------------|
| #1        | 0                                   | 600                          | 0                            | 18                    | XRD              |
| #2        | 1.0                                 | 600                          | 0.30                         | 23                    | XRD              |
| #3        | 1.0                                 | 700                          | 0.27                         | 25                    | XRD, TEM         |
| #4        | 1.7                                 | 670                          | 0.52                         | 43                    | XRD, TEM         |
| #5        | 2.0                                 | 600                          | 0.57                         | 70                    | XRD              |
| #6        | 1.0                                 | 800                          | 0.16                         | 16                    | E                |
| #7        | 1.0                                 | 800                          | 0.21                         | 90                    | E, M             |
| #8        | 1.0                                 | 700                          | 0.28                         | 60                    | XRD, E, XAS      |
| #9        | 1.7                                 | 750                          | 0.30                         | 70                    | E, M             |
| #10       | 1.7                                 | 750                          | 0.34                         | 85                    | E, M             |
| #11       | 1.7                                 | 735                          | 0.40                         | 80                    | XRD, E, XAS      |
| #12       | 1.7                                 | 735                          | 0.40                         | 95                    | E, M             |
| #13       | 1.7                                 | 675                          | 0.47                         | 85                    | E, M             |
| #14       | 2.0                                 | 720                          | 0.53                         | 70                    | XRD, E, PES, XAS |
| #15       | 0                                   | 600                          | 0                            | 117                   | M                |

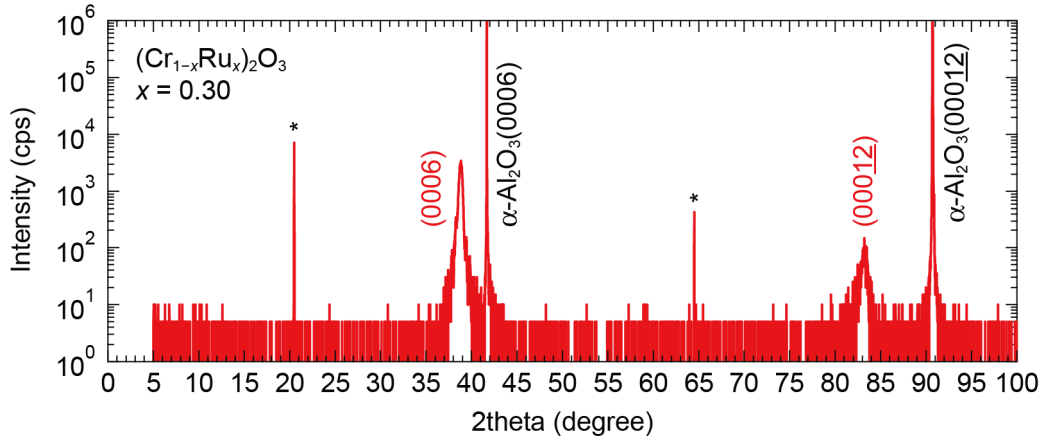

**Figure S1.** Wide-range out-of-plane XRD pattern for a  $(\text{Cr}_{0.70}\text{Ru}_{0.30})_2\text{O}_3$  film (sample #2). The asterisks indicate forbidden reflections of  $\alpha\text{-Al}_2\text{O}_3$ .

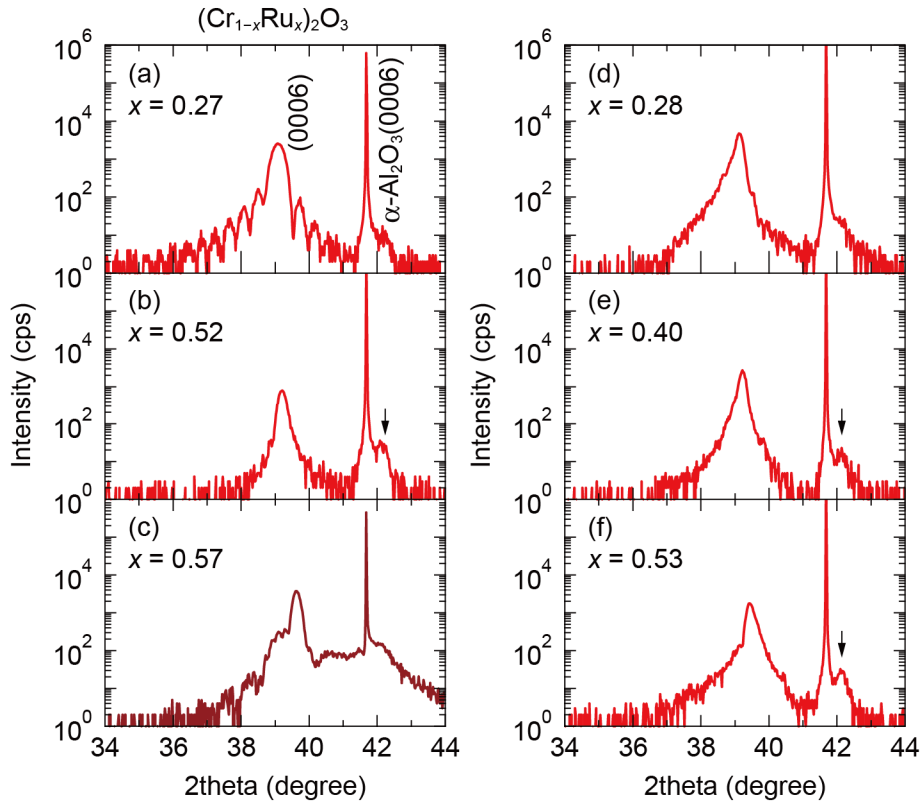

**Figure S2.** XRD patterns for the  $(\text{Cr}_{1-x}\text{Ru}_x)_2\text{O}_3$  films used for (a), (b) TEM analysis in Fig. 2, (c) a solubility limit check, and (d)–(f) spectroscopic measurements shown in Figs. 4 and 5. These films correspond to samples #3, 4, 5, 8, 11, and 14, respectively. With the exception of (c), the films exhibited sharp (0006) diffraction peaks. The arrows indicate an unidentified peak at approximately  $2\theta = 42.1^\circ$ . The asymmetry of diffraction peak seen in (c), (d), and (f) may reflect the structural inhomogeneity in the films.

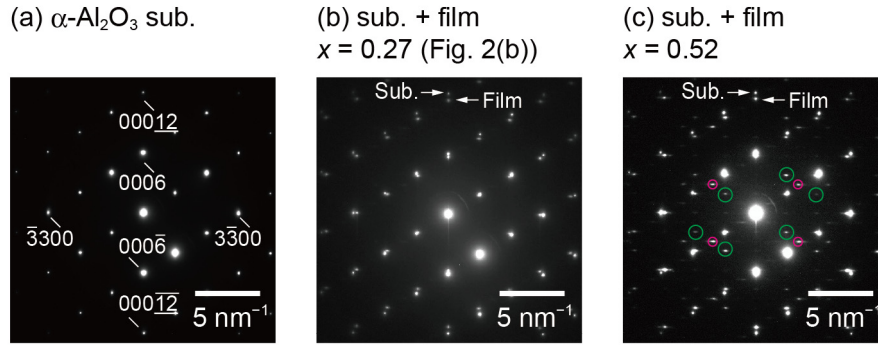

**Figure S3.** Selected-area diffraction patterns of (a) the  $\alpha$ - $\text{Al}_2\text{O}_3$  substrate region, (b) the film and substrate regions of a  $(\text{Cr}_{0.73}\text{Ru}_{0.27})_2\text{O}_3$  film (sample #3), and (c) the film and substrate regions of a  $(\text{Cr}_{0.48}\text{Ru}_{0.52})_2\text{O}_3$  film (sample #4). The data were acquired over an area of  $\sim$  a few hundreds of nm in diameter. As indicated by large green circles in (c), diffraction spots corresponding to the inverted domains appear for  $x = 0.52$ , consistent with the real-space TEM image in Fig. 2(c). Unidentified diffraction spots indicated by small pink circles might come from precipitates that are often generated in the pulsed-laser deposition process.

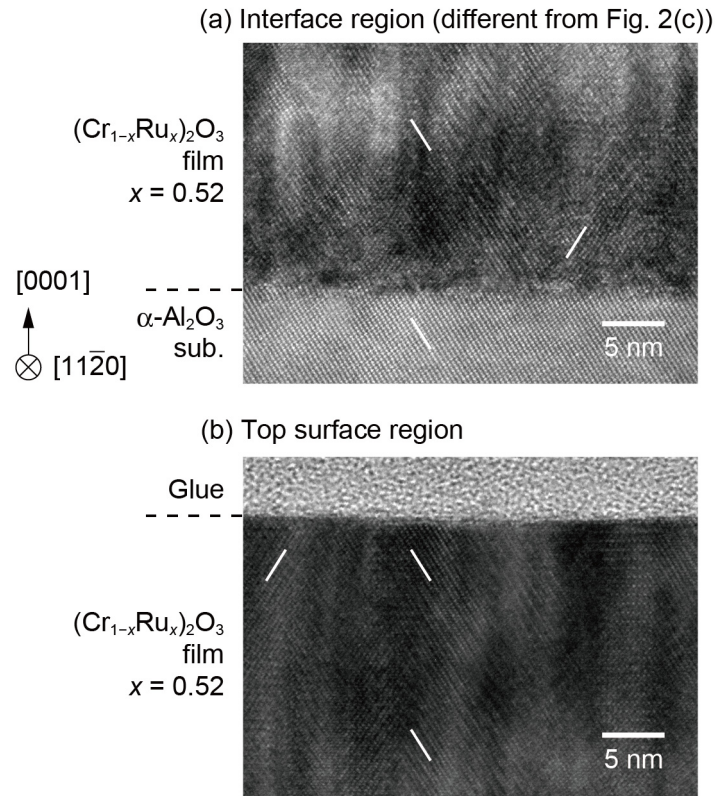

**Figure S4.** Bright-field TEM images of a  $(\text{Cr}_{0.48}\text{Ru}_{0.52})_2\text{O}_3$  film (sample #4) viewed along the  $[11\bar{2}0]$  direction: (a) the interface region (different from that shown in Fig. 2(c)) and (b) the top surface region. The  $(1\bar{1}02)$  plane characteristic of the corundum-type structure (indicated by slanting white lines) is commonly observed in all regions.

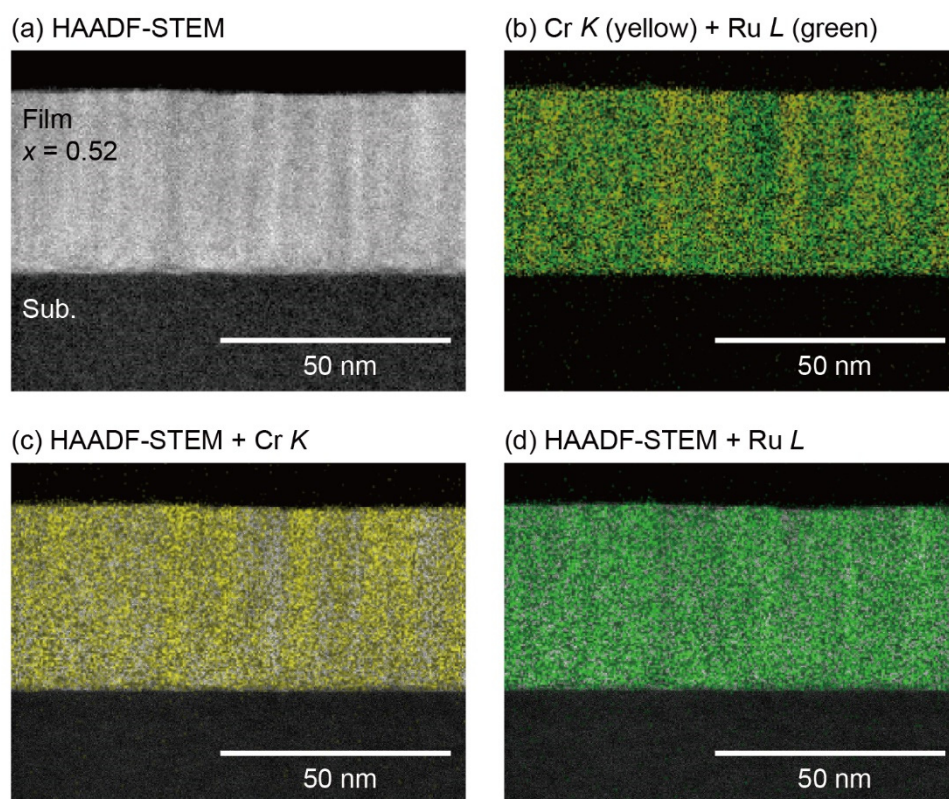

**Figure S5.** (a) High-angle annular dark-field scanning TEM (HAADF-STEM) image taken for a  $(\text{Cr}_{0.48}\text{Ru}_{0.52})_2\text{O}_3$  film (sample #4). Overlaid images of (b) Cr  $K$  (yellow) and Ru  $L$  (green) mapping results (count mode), (c) HAADF-STEM and Cr  $K$ , and (d) HAADF-STEM and Ru  $L$ . It is clear that the Ru-rich (green) region is not specific to the interface or the top surface of the film.

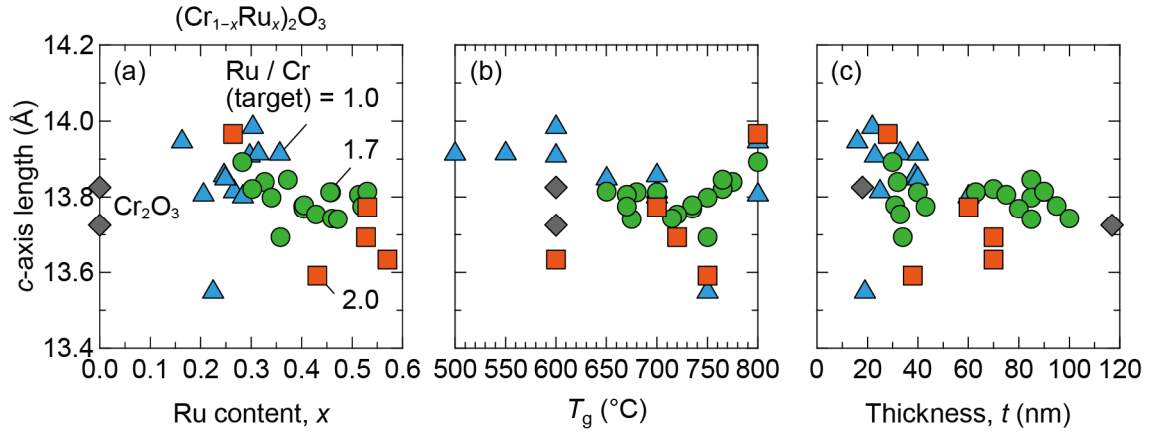

**Figure S6.** (a)  $x$  dependence of  $c$ -axis length ( $c_{\text{XRD}}$ ) for  $(\text{Cr}_{1-x}\text{Ru}_x)_2\text{O}_3$  films fabricated using targets with nominal Ru / Cr ratios of 1.0, 1.7, and 2.0. The results of non-doped  $\text{Cr}_2\text{O}_3$  films (samples #1 and 15) are also included for comparison. The  $c$ -axis length was calculated from the  $2\theta$  values of (0006) XRD peaks by assuming that the films were crystallized in the corundum structure. (b)  $T_g$  dependence and (c)  $t$  dependence of  $c$ -axis length for the same sample set. There are no clear systematic changes in  $c$ -axis length as  $x$ ,  $T_g$ , and  $t$  vary.

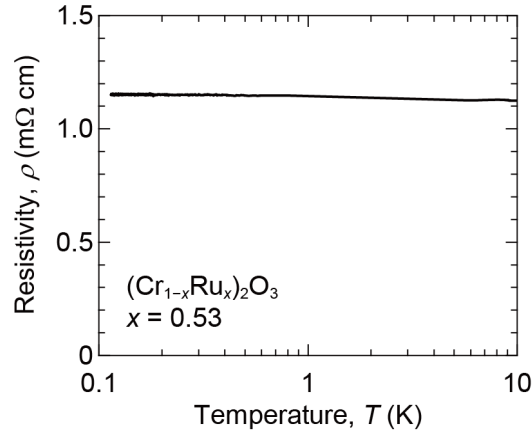

**Figure S7.**  $\rho$  versus  $T$  characteristics of a metallic  $(\text{Cr}_{0.47}\text{Ru}_{0.53})_2\text{O}_3$  film (sample #14) as evaluated by adiabatic demagnetization refrigerator (ADR) measurements. The XRD pattern is shown in Fig. S2(f).

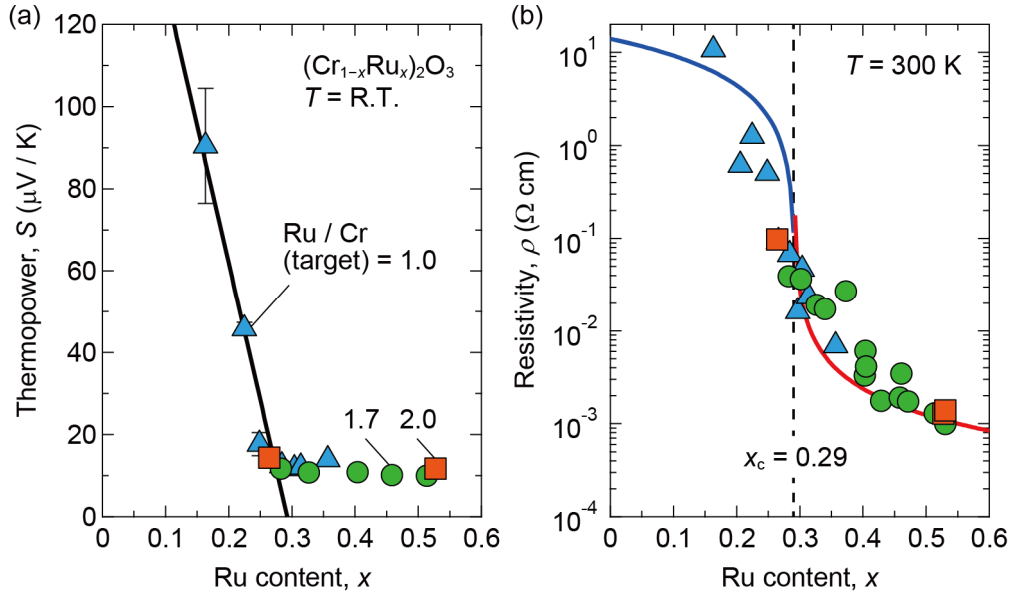

**Figure S8.** Fitting results for (a) thermopower  $S$  and (b) resistivity  $\rho$  based on the percolation model<sup>37,38</sup> assuming conducting  $\text{RuO}_2$  and non-conducting  $\text{Cr}_2\text{O}_3$  columnar domains grown perpendicular to the  $\alpha\text{-Al}_2\text{O}_3$  substrate. The data are the same as those shown in Fig. 3. Calculating a linear fit for the  $S$  data in the low- $x$  region (the bold black line in (a)) using Eq. 7 in Ref. 38, we first determined the percolation threshold  $x_c$  to be 0.29. Inserting the  $x_c$  value into Eq. 5 in Ref. 38, we analytically obtained a fitting curve for  $\rho$  below  $x_c$ , with  $\rho(x=0)$  of  $14 \Omega \text{ cm}$ , as shown by the bold blue curve in (b). However, this curve does not reproduce the trend of variation in  $\rho$ . Furthermore, the fitting parameter of  $\rho(x=0) = 14 \Omega \text{ cm}$  is too low for highly resistive  $\text{Cr}_2\text{O}_3$  films ( $x=0$ ) with  $\rho \gg 10^3 \Omega \text{ cm}$  (as checked by the two-probe method). The bold red curve shows a fitting curve for the  $\rho$  above  $x_c$ , which also deviates from the  $\rho$  data, in particular for  $0.30 < x < 0.40$ . The actual  $\rho$  values seem to decrease more gradually. Judging from these discrepancies, we conclude that the simple percolation model is not adequate for explaining the  $x$  dependence of  $\rho$  in  $(\text{Cr}_{1-x}\text{Ru}_x)_2\text{O}_3$  films.

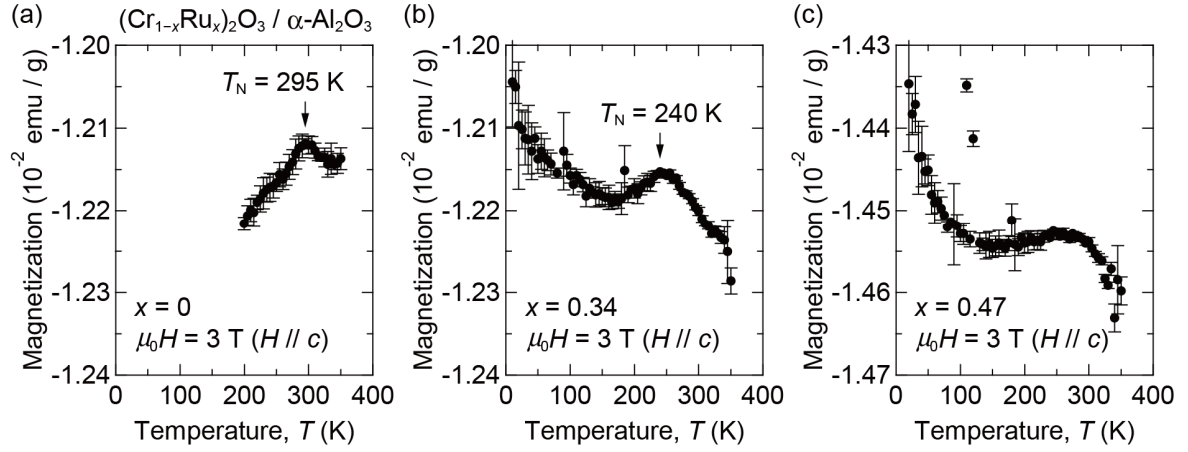

**Figure S9.** Magnetization versus temperature  $T$  curves measured for (a)  $\text{Cr}_2\text{O}_3$  (sample #15), (b)  $(\text{Cr}_{0.66}\text{Ru}_{0.34})_2\text{O}_3$  (sample #10), and (c)  $(\text{Cr}_{0.53}\text{Ru}_{0.47})_2\text{O}_3$  (sample #13) films in an out-of-plane magnetic field of  $\mu_0 H = 3$  T ( $\mu_0$  is the vacuum permeability and  $H$  is the magnetic field strength). Error bars indicate standard deviations of the data. The magnetization, including a diamagnetic contribution from the substrate, was normalized using the total sample weight (i.e., the total weight of the film and the 0.348 mm-thick  $\alpha\text{-Al}_2\text{O}_3$  substrate). The total sample weights of samples #15, 10, and 13 were 0.07202 g, 0.06457 g, and 0.06055 g, respectively. The upturns at low  $T$  in (b) and (c) were also seen for a bare  $\alpha\text{-Al}_2\text{O}_3$  substrate that experienced a similar heating process in the PLD chamber. Black arrows indicate local magnetization maximums used for the determination of  $T_N$ .

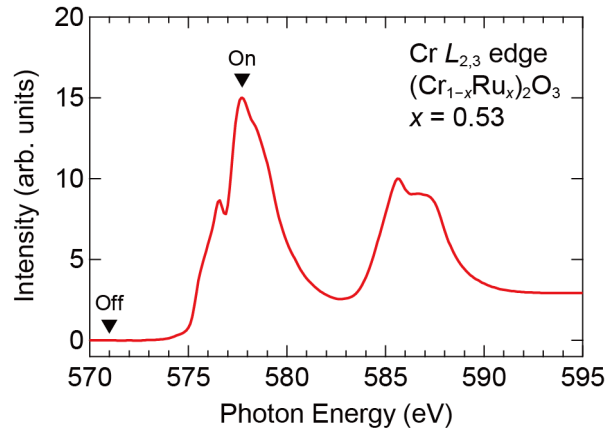

**Figure S10.** Cr  $L_{2,3}$  XAS data measured for a metallic  $(\text{Cr}_{0.47}\text{Ru}_{0.53})_2\text{O}_3$  film (sample #14). The spectral features are in excellent agreement with those of  $\text{Cr}^{3+}$ .<sup>41</sup> On-resonance and off-resonance photon energies for Cr  $2p\text{-}3d$  resonant PES (Fig. 4(b)) are indicated by black triangles.
